# Supplementary material for: Child Marriage and Climatic Factors: Evidence from Survey Data in Kenya
Source: Research Square preprint supplement (doi:10.21203/rs.3.rs-7797744/v1), 2025-11-03
Supplement: Supplementary file 1 [file 3dc25f2ead3e9a69cf2d40b9.docx]

**Supplementary material**

**Child Marriage and Climatic Factors: Evidence from Survey Data in Kenya**

**SI.1. Descriptive and bivariate analysis**

**Table SI.1.1: Variable definitions (Includes only variables included in the final model)**

| **Variables** | **Definition** | **Source** | **Year** |
| --- | --- | --- | --- |
| Child marriage | Percent of women aged 20+ who were married before 18 years | Kenya DHS dataset | 2014/15, 2022 |
| Education attainment | Percent of women who had no education, primary, secondary or higher education |
| Employment | Percent of women who worked in the last 12 months |
| Age | Women aged 15-49 years divided into 5-year age groups. Analysis focused on those 20+ years |
| First sex by 15 years | Percent of women aged 20+ years who had their first sex before 15 years of age |
| Media Exposure | This included reading a newspaper/magazine, listening to radio or watching TV, categorised into three: not at all, less than once a week and at least a week |
| Currently using modern FP | Percent of women who reported current use of modern contraceptive methods |
| Household wealth | Percent of women living in households in each of the 5 quintiles of wealth calculated based on ownership of assets: poorest, poorer, middle, richer, richest |
| Ethnicity | Percent of women affiliated to each ethnic group in the survey |
| Religion | Percent of women reporting none, Christian, Muslim or other religions |
| Place of residence | Percent of women living in urban or rural areas |
| Region | Percent of women living in any of the 47 counties in Kenya |
| Number of children below 5 years within household | Number of children aged 5 years and below residing in the same household |
| Temperature | Average annual land surface temperature for the year of survey divided into four categories:  0—19.999 = Below 20 degrees, 20.0—24.999 = Between 20 and 25 degrees, 25.0—29.99 = Between 25 and 30 degrees, 30.0+ = More than 30 degrees | Data sourced from Hulley and Hook (2021) and further standardised and processed by WorldPop at 100 meters | 2015, 2022 |

**Table SI.1.2: Socio-demographic and background characteristics of women, and bivariate association with child marriage**

| **Variable** | **2014** | | | **2022** | | |
| --- | --- | --- | --- | --- | --- | --- |
|  | **% (weighted) /mean** | **Bivariate association** | **N (un-weighed)** | **% (weighted) /mean** | **Bivariate association** | **N (un-weighed)** |
| **Child marriage** |  |  |  |  |  |  |
| no | 72.60 |  | 17,117 | 77.60 |  | 19,197 |
| yes | 27.40 |  | 7,758 | 22.40 |  | 6,556 |
| **Education attainment***** |  |  |  |  |  |  |
| No education | 8.10 | 0.53 | 3,821 | 6.30 | 0.51 | 3,481 |
| primary | 50.30 | 0.38 | 12,369 | 37.40 | 0.39 | 9,602 |
| secondar | 28.50 | 0.13 | 6,097 | 33.00 | 0.12 | 7,912 |
| Higher | 13.10 | 0.02 | 2,588 | 22.80 | 0.02 | 4,757 |
| **5-year age groups***** |  |  |  |  |  |  |
| 20-24 | 22.70 | 0.23 | 5,388 | 23.00 | 0.13 | 5,762 |
| 25-29 | 24.10 | 0.28 | 5,902 | 21.80 | 0.20 | 5,443 |
| 30-34 | 17.80 | 0.29 | 4,431 | 17.30 | 0.27 | 4,561 |
| 35-39 | 14.90 | 0.26 | 3,851 | 16.50 | 0.30 | 4,354 |
| 40-44 | 11.40 | 0.31 | 2,968 | 11.80 | 0.26 | 3,100 |
| 45-49 | 8.90 | 0.32 | 2,335 | 9.60 | 0.25 | 2,532 |
| **First sex by 15 years***** |  |  |  |  |  |  |
| no | 85.40 | 0.24 | 21,211 | 83.20 | 0.18 | 20,935 |
| yes | 14.60 | 0.44 | 3,664 | 16.80 | 0.43 | 4,814 |
| **Currently using modern FP**** | |  |  |  |  |  |
| no | 54.00 | 0.27 | 14,381 | 50.70 | 0.21 | 14,130 |
| yes | 46.00 | 0.28 | 10,494 | 49.30 | 0.24 | 11,622 |
| **Employment*a** |  |  |  |  |  |  |
| working | 11.10 | 0.28 | 3,315 | 30.50 | 0.22 | 9,288 |
| Not working | 36.00 | 0.27 | 8,505 | 69.50 | 0.22 | 16,464 |
| **Household wealth***** |  |  |  |  |  |  |
| poorest | 15.00 | 0.46 | 5,702 | 14.50 | 0.39 | 5,427 |
| poorer | 16.80 | 0.36 | 4,616 | 16.30 | 0.34 | 4,306 |
| middle | 18.60 | 0.31 | 4,619 | 18.30 | 0.25 | 4,966 |
| richer | 21.50 | 0.23 | 4,875 | 23.20 | 0.17 | 5,999 |
| richest | 28.10 | 0.13 | 5,063 | 27.70 | 0.11 | 5,054 |
| **Sex of household head***** |  |  |  |  |  |  |
| male | 64.00 | 0.29 | 15,614 | 62.20 | 0.24 | 16,955 |
| female | 36.00 | 0.25 | 9,261 | 37.80 | 0.20 | 9,797 |
| **Ethnicity***** |  |  |  |  |  |  |
| Kalenjin | 11.70 | 0.28 | 3,441 | 14.00 | 0.23 | 4,032 |
| Kamba | 11.40 | 0.19 | 2,334 | 11.40 | 0.14 | 2,254 |
| kikuyu | 23.10 | 0.17 | 4,263 | 19.20 | 0.14 | 3,735 |
| Luhya | 14.50 | 0.29 | 2,842 | 16.00 | 0.23 | 3,213 |
| Luo | 10.80 | 0.41 | 2,403 | 11.10 | 0.29 | 2,562 |
| other | 28.40 | 0.33 | 9,592 | 28.40 | 0.29 | 9,956 |
| **Religion***** |  |  |  |  |  |  |
| Christian | 91.60 | 0.26 | 21,124 | 88.70 | 0.22 | 20,977 |
| Islam | 6.40 | 0.41 | 3,212 | 6.80 | 0.32 | 3,673 |
| no religion | 1.70 | 0.49 | 444 | 1.10 | 0.29 | 304 |
| other | 0.30 | 0.18 | 95 | 3.40 | 0.26 | 798 |
| **Place of residence***** |  |  |  |  |  |  |
| urban | 42.90 | 0.20 | 9,631 | 43.50 | 0.15 | 10,374 |
| rural | 57.10 | 0.33 | 15,244 | 56.50 | 0.28 | 15,378 |
| **Media Exposure***** |  |  |  |  |  |  |
| not at all | 12.10 | 0.44 | 4,427 | 11.20 | 0.34 | 4,524 |
| less than once a week | 10.40 | 0.32 | 2,859 | 9.50 | 0.26 | 2,556 |
| at least once a week | 77.60 | 0.24 | 17,589 | 79.30 | 0.20 | 18,672 |
| **Number of children below 5 years within household*****^ | 0.96 | 1.14 | 24,875 | 0.83 | 0.95 | 25,752 |
| **Region***** |  |  |  |  |  |  |
| Mombasa | 3.10 | 0.21 | 509 | 3.10 | 0.20 | 638 |
| Kwale | 1.90 | 0.37 | 528 | 1.50 | 0.37 | 548 |
| Kilifi | 3.10 | 0.39 | 634 | 2.70 | 0.34 | 571 |
| Tana River | 0.60 | 0.58 | 523 | 0.50 | 0.42 | 529 |
| Lamu | 0.30 | 0.35 | 466 | 0.30 | 0.28 | 511 |
| Taita Taveta | 0.70 | 0.20 | 403 | 0.80 | 0.21 | 422 |
| Garissa | 0.80 | 0.42 | 445 | 0.80 | 0.41 | 444 |
| Wajir | 0.70 | 0.50 | 426 | 0.40 | 0.37 | 527 |
| Mandera | 0.60 | 0.38 | 425 | 0.60 | 0.39 | 555 |
| Marsabit | 0.30 | 0.44 | 439 | 0.40 | 0.35 | 446 |
| Isiolo | 0.30 | 0.47 | 504 | 0.40 | 0.30 | 503 |
| Meru | 3.70 | 0.29 | 570 | 3.00 | 0.31 | 487 |
| Tharaka-Nithi | 0.90 | 0.20 | 429 | 0.90 | 0.20 | 465 |
| Embu | 1.50 | 0.16 | 522 | 1.20 | 0.16 | 510 |
| Kitui | 2.30 | 0.25 | 581 | 2.30 | 0.23 | 543 |
| Machakos | 2.90 | 0.18 | 590 | 3.10 | 0.11 | 575 |
| Makueni | 2.00 | 0.19 | 562 | 2.00 | 0.13 | 567 |
| Nyandarua | 1.50 | 0.21 | 477 | 1.20 | 0.21 | 462 |
| Nyeri | 2.20 | 0.19 | 603 | 1.60 | 0.12 | 453 |
| Kirinyaga | 1.60 | 0.19 | 486 | 1.60 | 0.15 | 529 |
| Murang'a | 2.40 | 0.17 | 513 | 2.10 | 0.15 | 449 |
| Kiambu | 5.80 | 0.16 | 539 | 7.00 | 0.14 | 583 |
| Turkana | 1.10 | 0.46 | 423 | 1.10 | 0.26 | 531 |
| West Pokot | 0.90 | 0.35 | 454 | 1.20 | 0.32 | 594 |
| Samburu | 0.40 | 0.45 | 480 | 0.50 | 0.49 | 501 |
| Trans Nzoia | 2.30 | 0.32 | 533 | 2.00 | 0.23 | 559 |
| Uasin Gishu | 2.60 | 0.21 | 571 | 3.20 | 0.14 | 611 |
| Elgeyo-Marakwet | 0.80 | 0.20 | 501 | 0.80 | 0.16 | 506 |
| Nandi | 2.00 | 0.24 | 586 | 1.90 | 0.19 | 583 |
| Baringo | 1.00 | 0.25 | 458 | 1.10 | 0.19 | 546 |
| Laikipia | 1.10 | 0.27 | 500 | 1.00 | 0.19 | 454 |
| Nakuru | 5.10 | 0.23 | 613 | 5.30 | 0.20 | 642 |
| Narok | 2.10 | 0.44 | 570 | 2.10 | 0.38 | 571 |
| Kajiado | 2.20 | 0.23 | 534 | 3.00 | 0.20 | 586 |
| Kericho | 1.80 | 0.32 | 514 | 2.30 | 0.23 | 638 |
| Bomet | 2.20 | 0.36 | 572 | 1.90 | 0.34 | 609 |
| Kakamega | 3.40 | 0.32 | 577 | 3.70 | 0.23 | 610 |
| Vihiga | 1.10 | 0.24 | 465 | 1.00 | 0.21 | 504 |
| Bungoma | 3.50 | 0.31 | 601 | 3.20 | 0.25 | 632 |
| Busia | 1.60 | 0.42 | 521 | 1.80 | 0.30 | 597 |
| Siaya | 1.80 | 0.37 | 509 | 1.60 | 0.32 | 514 |
| Kisumu | 2.50 | 0.34 | 544 | 2.40 | 0.31 | 615 |
| Homa Bay | 2.50 | 0.53 | 565 | 1.90 | 0.38 | 546 |
| Migori | 2.00 | 0.59 | 606 | 2.00 | 0.45 | 597 |
| Kisii | 2.70 | 0.30 | 614 | 2.40 | 0.31 | 553 |
| Nyamira | 1.10 | 0.31 | 516 | 0.90 | 0.35 | 488 |
| Nairobi | 13.10 | 0.15 | 874 | 14.50 | 0.13 | 848 |
| **Total** | **100.00** | 0.27 | **24,875** | **100.00** | 0.22 | **25,752** |
| **Contextual Variables** |  |  |  |  |  |  |
| **Mean land surface temperature***** |  |  |  |  |  |  |
| Below 20 degrees | 3.60 | 0.27 | 818 | 5.70 | 0.22 | 1,322 |
| Between 20 and 25 degrees | 43.10 | 0.23 | 9,386 | 54.20 | 0.20 | 11,298 |
| Between 25 and 30 degrees | 36.40 | 0.29 | 7,987 | 26.00 | 0.25 | 6,475 |
| More than 30 degrees | 16.90 | 0.35 | 6,684 | 14.10 | 0.30 | 6,657 |
| p-values are produced using Pearson’s Chi-square test, with a significance level of 0.05. “Svy” command used to account for weighting and sampling design. | | | | | | |
| * *p* < 0.05, ** *p* < 0.01, *** *p* < 0.001; a2014 value is sign. while 2022 is not; b2022 value is sign. while 2014 is not  ^ calculated using a t-test for equality of means. “Svy” command used to account for weighting and sampling design | | | | | | |

**SI.2 Multivariate multilevel modelling**

**Table SI.2.1: Multivariate multilevel modelling of child marriage and its associated factors in Kenya**

Odds ratios and 95% confidence intervals from the two-level logistic regression model child marriage in 2014 and 2022.

| **Variable** | **R1 2014** | **CI** | **R2 2022** | **CI** |
| --- | --- | --- | --- | --- |
| *Education level, ref: None* |  |  |  |  |
| Primary | 0.643 | [0.54,0.77]*** | 0.548 | [0.46,0.66]*** |
| Secondary | 0.180 | [0.15,0.22]*** | 0.134 | [0.11,0.17]*** |
| Higher | 0.0346 | [0.02,0.05]*** | 0.024 | [0.02,0.03]*** |
|  |  |  |  |  |
| *Age, ref: 15-19* |  |  |  |  |
| 20-24 | 0.592 | [0.50,0.69]*** | 0.664 | [0.55,0.80]*** |
| 25-29 | 0.817 | [0.69,0.96]* | 1.092 | [0.92,1.30] |
| 30-34 | 0.793 | [0.67,0.94]** | 1.333 | [1.11,1.60]** |
| 35-39 | 0.592 | [0.50,0.70]*** | 1.435 | [1.20,1.71]*** |
| 40-44 | 0.799 | [0.67,0.95]* | 1.200 | [1.00,1.44]* |
| 45-49 | 1 | [1.00,1.00] | 1 | [1.00,1.00] |
|  |  |  |  |  |
| *Employed, ref: No* |  |  |  |  |
| Yes | 1.111 | [0.96,1.28] | 1.227 | [1.08,1.39]** |
|  |  |  |  |  |
| *Sexually active by age 15, ref: No* |  |  |  |  |
| yes | 2.127 | [1.90,2.38]*** | 2.853 | [2.54,3.21]*** |
|  |  |  |  |  |
| *Current use of any modern contraceptive, ref: No* |  |  |  |  |
| Yes | 1.318 | [1.19,1.46]*** | 1.217 | [1.09,1.36]*** |
|  |  |  |  |  |
| *Religion, ref: Christian* |  |  |  |  |
| Islam | 1.374 | [1.07,1.76]* | 1.059 | [0.81,1.38] |
| No religion | 1.190 | [0.89,1.59] | 0.914 | [0.62,1.35] |
|  |  |  |  |  |
| *Ethnicity, ref: Kalenjin* |  |  |  |  |
| Kamba | 1.047 | [0.70,1.57] | 0.527 | [0.33,0.83]** |
| kikuyu | 1.116 | [0.81,1.53] | 0.974 | [0.69,1.37] |
| Luhya | 1.402 | [1.09,1.81]** | 0.912 | [0.68,1.23] |
| Luo | 1.948 | [1.37,2.78]*** | 1.243 | [0.84,1.83] |
| other | 1.208 | [0.90,1.62] | 1.037 | [0.76,1.41] |
|  |  |  |  |  |
| Number of children under 5 in household | 1.021 | [0.97,1.07] | 1.042 | [0.99,1.10] |
|  |  |  |  |  |
| *Sex of household head, ref: male* |  |  |  |  |
| female | 0.804 | [0.73,0.88]*** | 0.805 | [0.73,0.89]*** |
|  |  |  |  |  |
| *Household wealth quintile, ref: poorest* |  |  |  |  |
| poorer | 0.950 | [0.83,1.09] | 1.178 | [1.02,1.37]* |
| middle | 0.972 | [0.83,1.13] | 1.122 | [0.95,1.32] |
| richer | 0.826 | [0.69,0.98]* | 0.951 | [0.78,1.16] |
| richest | 0.625 | [0.49,0.79]*** | 1.051 | [0.81,1.36] |
|  |  |  |  |  |
| *Place of residence, ref: urban* |  |  |  |  |
| rural | 0.980 | [0.87,1.11] | 1.119 | [0.95,1.32] |
|  |  |  |  |  |
| *Media exposure, ref: not at all* |  |  |  |  |
| less than once a week | 0.901 | [0.78,1.05] | 0.989 | [0  .82,1.19] |
| at least once a week | 0.980 | [0.86,1.11] | 1.165 | [1.00,1.36] |
|  |  |  |  |  |
| *Average annual land surface temperature, ref: Below 20 degrees* |  |  |  |  |
| Between 20 and 25 degrees | 0.785 | [0.57,1.09] | 1.230 | [0.95,1.60] |
| Between 25 and 30 degrees | 0.807 | [0.58,1.13] | 1.340 | [0.95,1.89]* |
| More than 30 degrees | 0.869 | [0.59,1.27] | 1.570 | [1.04,2.36]* |
|  |  |  |  |  |
| *County; Ref: Mombasa* |  |  |  |  |
| Kwale | 1.215 | [0.78,1.89] | 1.595 | [1.11,2.30]* |
| Kilifi | 1.574 | [1.06,2.33]* | 1.396 | [1.06,1.83]* |
| Tana river | 2.457 | [1.69,3.58]*** | 1.638 | [1.18,2.27]** |
| Lamu | 1.310 | [0.86,2.00] | 0.979 | [0.73,1.31] |
| Taita Taveta | 0.901 | [0.60,1.36] | 1.035 | [0.67,1.60] |
| Garissa | 1.162 | [0.73,1.85] | 1.592 | [1.01,2.51]* |
| Wajir | 1.328 | [0.88,2.00] | 0.830 | [0.54,1.27] |
| Mandera | 0.88 | [0.57,1.49] | 0.946 | [0.65,1.37] |
| Marsabit | 1.561 | [1.06,2.31]* | 0.887 | [0.64,1.22] |
| Isiolo | 1.940 | [1.34,3.01]*** | 1.227 | [0.86,1.74] |
| Meru | 1.038 | [0.69,1.56] | 1.419 | [0.86,2.35] |
| Tharaka-Nithi | 0.691 | [0.46,1.05] | 0.871 | [0.55,1.37] |
| Embu | 0.597 | [0.38,0.94]* | 0.777 | [0.46,1.32] |
| Kitui | 0.884 | [0.54,1.46] | 2.114 | [1.28,3.48]** |
| Machakos | 0.827 | [0.49,1.39] | 1.045 | [0.62,1.75] |
| Makueni | 0.815 | [0.52,1.29] | 0.936 | [0.52,1.70] |
| Nyandarua | 0.995 | [0.59,1.69] | 1.314 | [0.77,2.24] |
| Nyeri | 1.130 | [0.71,1.79] | 0.869 | [0.45,1.66] |
| Kirinyaga | 0.698 | [0.44,1.10] | 0.671 | [0.37,1.20] |
| Murang'a | 0.801 | [0.49,1.30] | 0.612 | [0.33,1.14] |
| Kiambu | 1.234 | [0.80,1.90] | 1.241 | [0.75,2.06] |
| Turkana | 1.613 | [0.85,3.06] | 0.686 | [0.46,1.03] |
| West Pokot | 1.589 | [0.99,2.54] | 1.407 | [0.85,2.32] |
| Samburu | 1.996 | [1.29,3.09]** | 2.404 | [1.57,3.69]*** |
| Trans-Nzoia | 1.429 | [0.92,2.22] | 1.437 | [0.84,2.46] |
| Uasin Gishu | 1.197 | [0.73,1.97] | 1.118 | [0.67,1.86] |
| Elgeyo Marakwet | 1.129 | [0.69,1.86] | 1.014 | [0.53,1.95] |
| Nandi | 1.064 | [0.67,1.69] | 0.880 | [0.49,1.56] |
| Baringo | 1.170 | [0.76,1.80] | 0.684 | [0.42,1.11] |
| Laikipia | 1.247 | [0.72,2.17] | 1.001 | [0.61,1.64] |
| Nakuru | 1.410 | [0.93,2.15] | 1.484 | [0.87,2.53] |
| Narok | 2.617 | [1.67,4.11]*** | 1.999 | [1.19,3.37]** |
| Kajiado | 1.431 | [0.99,2.07] | 1.322 | [0.85,2.05] |
| Kericho | 2.108 | [1.31,3.40]** | 1.108 | [0.65,1.89] |
| Bomet | 2.311 | [1.42,3.75]*** | 2.506 | [1.43,4.39]** |
| Kakamega | 1.373 | [0.87,2.17] | 1.257 | [0.76,2.08] |
| Vihiga | 0.928 | [0.59,1.45] | 1.254 | [0.74,2.12] |
| Bungoma | 1.337 | [0.85,2.09] | 1.448 | [0.81,2.59] |
| Busia | 1.855 | [1.14,3.02]* | 1.125 | [0.70,1.82] |
| Siaya | 1.284 | [0.81,2.03] | 1.126 | [0.68,1.86] |
| Kisumu | 1.571 | [1.00,2.46]* | 1.516 | [0.94,2.45] |
| Homa bay | 2.371 | [1.54,3.66]*** | 1.734 | [1.02,2.94]* |
| Migori | 3.027 | [2.01,4.56]*** | 2.323 | [1.45,3.71]*** |
| Kisii | 2.056 | [1.29,3.28]** | 2.112 | [1.20,3.70]** |
| Nyamira | 2.060 | [1.32,3.21]** | 2.575 | [1.56,4.26]*** |
| Nairobi | 1.155 | [0.78,1.72] | 1.062 | [0.58,1.94] |
|  |  |  |  |  |
| Constant | 0.757 | [0.41,1.39] | 0.280 | [0.15,0.52]*** |
|  |  |  |  |  |
| Cluster Level Variance | 0.453 | [0.40,0.52]*** | 0.685 | [0.56,0.83]*** |
| Observations | 24,875 |  | 25,749 |  |

Exponentiated coefficients; 95% confidence intervals in brackets

* *p* < 0.05, ** *p* < 0.01, *** *p* < 0.001

**Figure SI.2.1: Multilevel modelling for individual 5-year age groups**

**Figure SI.2.1a 20-24 years**

Sample size: 5,388 (2014); 5,762 (2022)


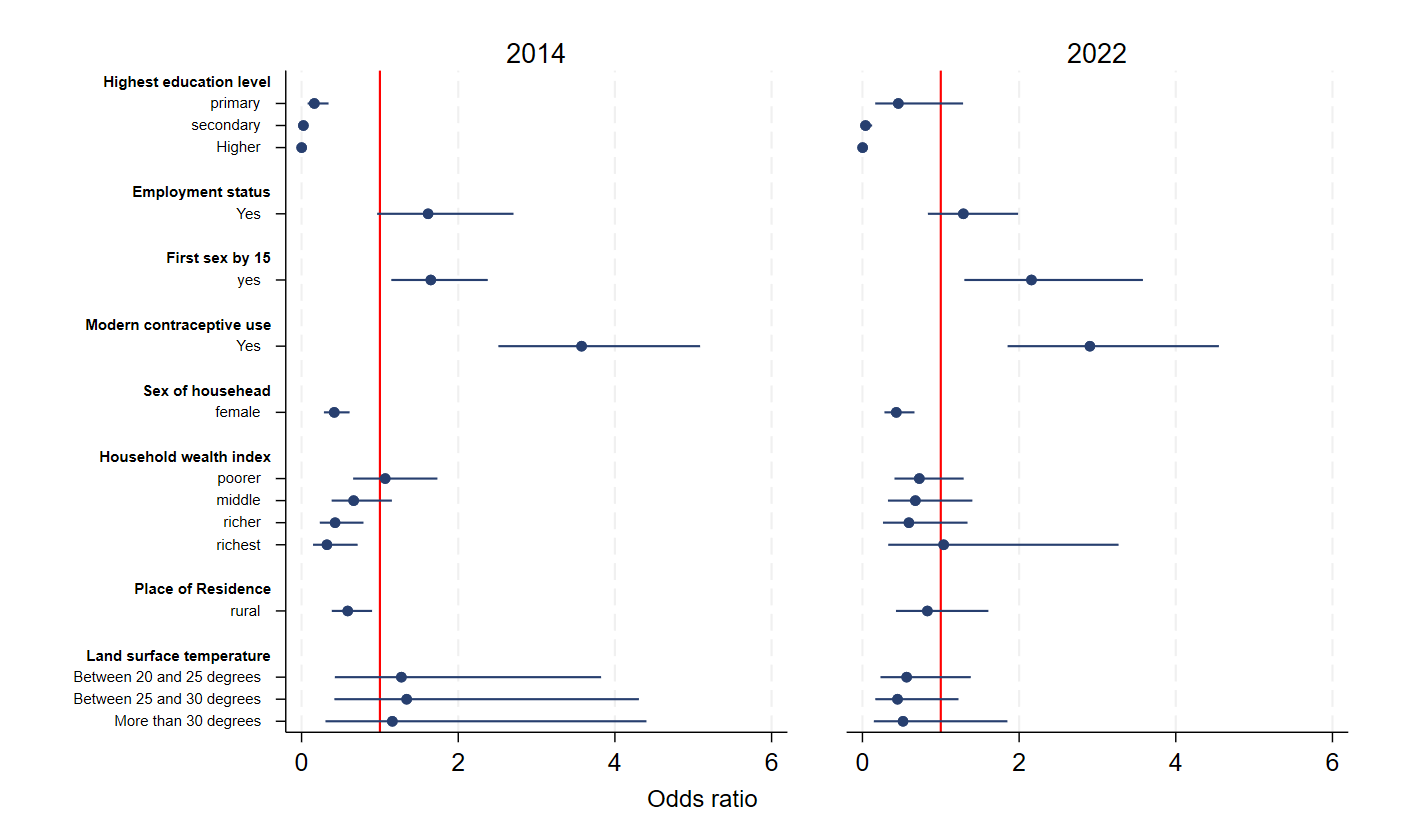


**Figure SI.2.1b 25-29 years**

Sample size: 5,902 (2014), 5,443 (2022)


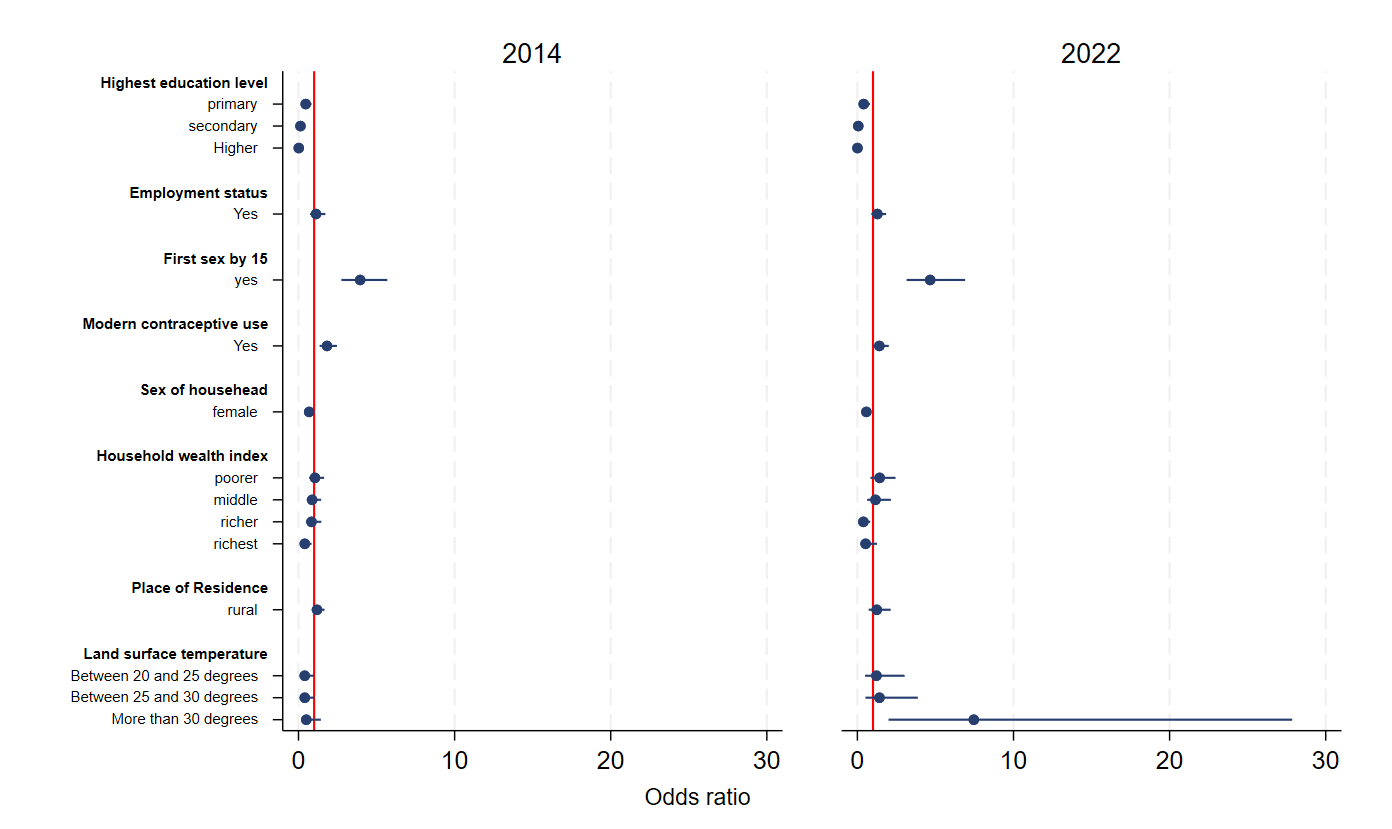


**Figure SI.2. 1c 30-34 years**

Sample size: 4,431 (2014), 4,561 (2022)


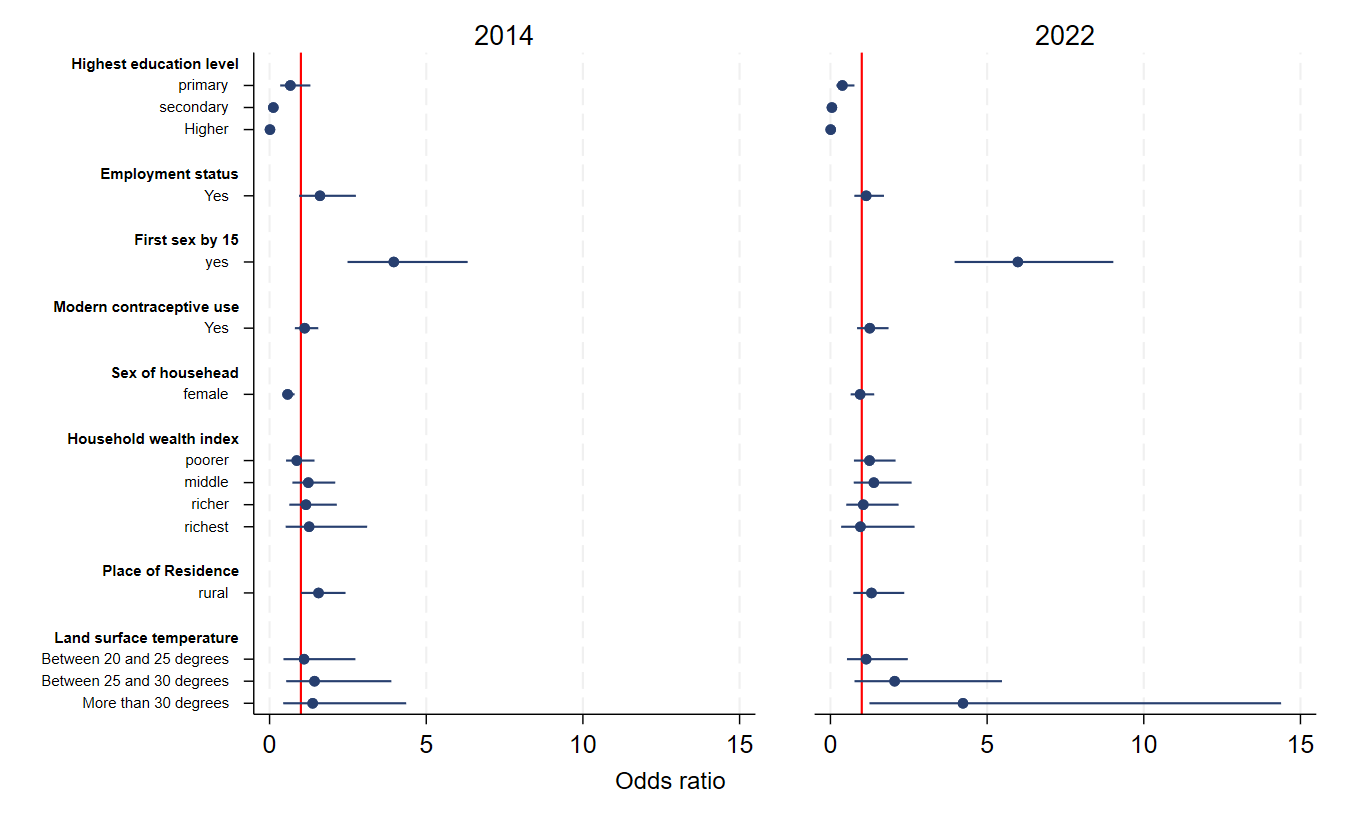


**Figure SI.2.1d 35-39 years**

Sample size: 3,851 (2014), 4,354 (2022)


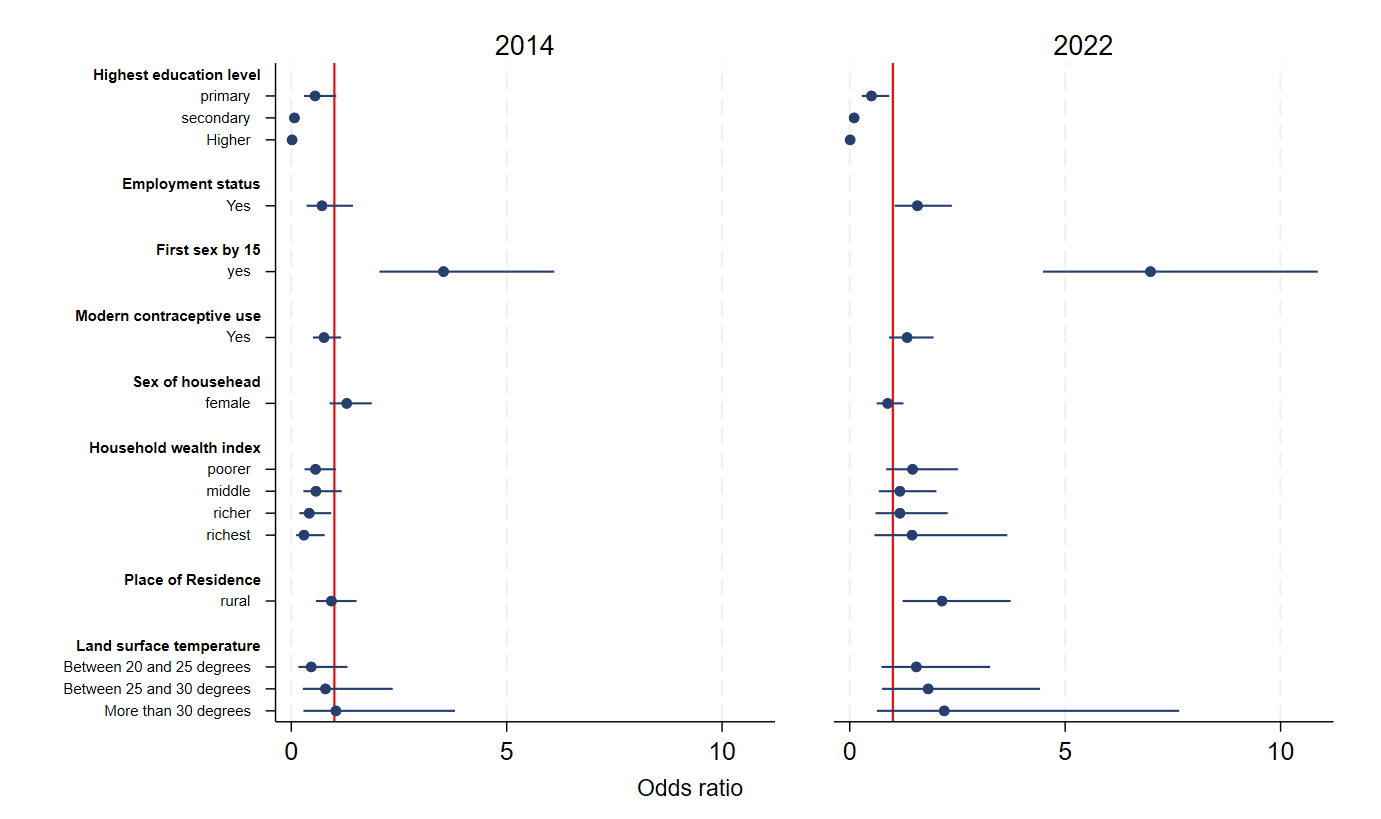


**Figure SI.2.1e 40-44 years**

Sample size: 2,968 (2014), 3,100 (2022)


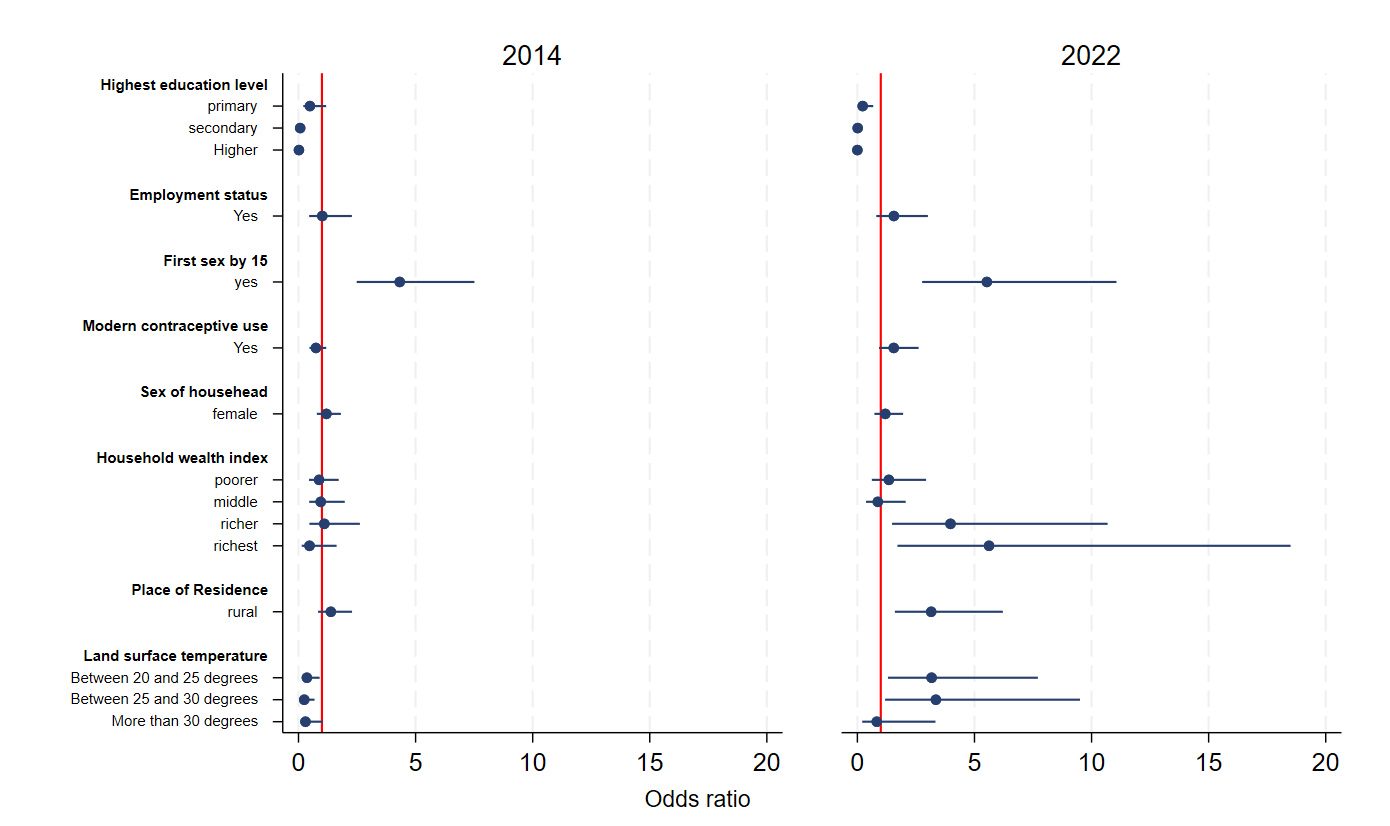


**Figure SI.2.1f 45-49 years**

Sample size: 2,335 (2014), 2,532 (2022)


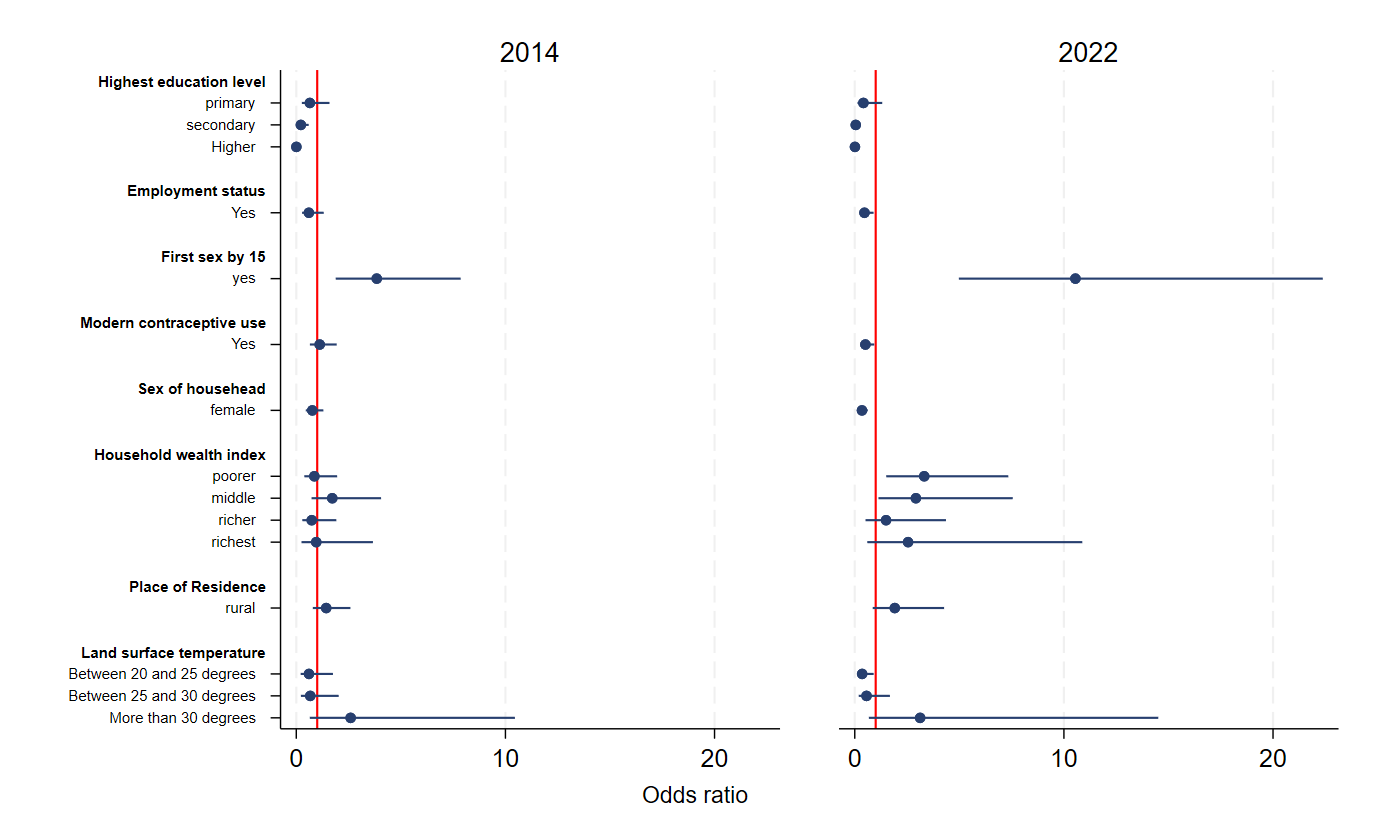


**SI.3: Sub- County level high resolution maps**

**Table SI.3.1. List of covariates**

| **Full list** | **Covariate** | **Description** | **Year** | **Source** |
| --- | --- | --- | --- | --- |
| built_volume | Built Volume | Built-up volume (in m3). GHSL BUILT-V data are combined with Microsoft Building Footprints, Google Open Buildings footprints and World Settlement Footprint. Missing built-up pixels in GHSL but existing built-up pixels in Microsoft Building footprints, Google Building footprints and/or World Settlement Footprint were transformed to building volumes through the help of interpolated GHSL BUILT-H data and added to the base GHSL layer. | 2020 | Pesaresi, M. and Politis, P. (2023) GHS-BUILT-V R2023A – GHS built-up volume grids derived from joint assessment of Sentinel2, Landsat, and global DEM data, multitemporal (1975-2030).European Commission, Joint Research Centre (JRC)  PID: <http://data.europa.eu/89h/ab2f107a-03cd-47a3-85e5-139d8ec63283>, doi:10.2905/AB2F107A-03CD-47A3-85E5-139D8EC63283   Pesaresi, M. and Politis, P. (2023) GHS-BUILT-H R2023A – GHS building height, derived from AW3D30, SRTM30, and Sentinel2 composite (2018). European Commission, Joint Research Centre (JRC)  PID: <http://data.europa.eu/89h/85005901-3a49-48dd-9d19-6261354f56fe>, doi:10.2905/85005901-3A49-48DD-9D19-6261354F56FE   Microsoft (2023). GlobalMLBuildingFootprints. <https://github.com/microsoft/GlobalMLBuildingFootprints>. [Accessed July 2023].   Sirko, W. et al. (2021). Continental-Scale Building Detection from High Resolution Satellite Imagery. arXiv:2107.12283. <https://ui.adsabs.harvard.edu/abs/2021arXiv210712283S>.   German Aerospace Center (DLR) (2021). World Settlement Footprint (WSF) 2019. <https://doi.org/10.15489/twg5xsnquw84> |
| distance_coastline | Distance to Coastline | Distance (in kilometres) from its centre to the nearest open-water coastline | 2021 | Zanaga, D., Van De Kerchove, R., Daems, D., De Keersmaecker, W., Brockmann, C., Kirches, G., Wevers, J., Cartus, O., Santoro, M., Fritz, S., Lesiv, M., Herold, M., Tsendbazar, N.E., Xu, P., Ramoino, F., Arino, O., 2022. ESA WorldCover 10 m 2021 v200. <https://doi.org/10.5281/zenodo.7254221> |
| distance_conflict | Distance to Conflict | Distance (in kilometers) to points of conflict provided by ACLED as XY coordinates for 3 years prior to each survey year - e.g. - 01/01/2007 - 31/12/2009 for 2010. | 2007-2009; 2018-2020 | Armed Conflict Location & Event Data Project (ACLED); [www.acleddata.com](file:///C:\Users\emw82\Downloads\www.acleddata.com) |
| distance_cultivated | Distance to Cultivated Areas | Distance (in kilometres) to landcover classed as cultivated. | 2010, 2021 | ESA (European Space Agency) CCI (Climate Change Initiative) Land Cover project 2017. "Land Cover CCI Product - Annual LC maps from 2000 to 2015 (v2.0.7)." <http://maps.elie.ucl.ac.be/CCI/viewer/>   Defourny, P. et al. (2019). C3S - Product User Guide and Specification ICDR Land Cover 2016 to 2018, v1.2, <https://datastore.copernicus-climate.eu/documents/satellite-land-cover/D3.3.12-v1.2_PUGS_ICDR_LC_v2.1.x_PRODUCTS_v1.2.pdf>   Copernicus Climate Change Service, Climate Data Store, (2019): Land cover classification gridded maps from 1992 to present derived from satellite observation. Copernicus Climate Change Service (C3S) Climate Data Store (CDS). DOI: 10.24381/cds.006f2c9a (Accessed on 20-02-2023) |
| distance_protected | Distance to Protected Areas | Distance to IUCN strict nature reserve and wilderness area edges [km] | 2010, 2021 | UNEP-WCMC & IUCN (2023), Protected Planet: The World Database on Protected Areas (WDPA) and World Database on Other Effective Area-based Conservation Measures (WD-OECM) [Online], January 2023, Cambridge, UK: UNEP-WCMC and IUCN. Available at: [www.protectedplanet.net](file:///C:\Users\emw82\Downloads\www.protectedplanet.net). |
| distance_roads | Distance to Roads | Distance to Microsoft Roads [km] | 2020-2022 | Licensed by Microsoft under the Open Data Commons Open Database License (ODbL). <https://github.com/microsoft/RoadDetections?tab=readme-ov-file> |
| distance_water | Distance to Inland Water | Distance (in km) to the nearest inland water body based on a 75% water coverage threshold. | 2021 | Zanaga, D., Van De Kerchove, R., Daems, D., De Keersmaecker, W., Brockmann, C., Kirches, G., Wevers, J., Cartus, O., Santoro, M., Fritz, S., Lesiv, M., Herold, M., Tsendbazar, N.E., Xu, P., Ramoino, F., Arino, O., 2022. ESA WorldCover 10 m 2021 v200. <https://doi.org/10.5281/zenodo.7254221> |
| elevation | Elevation | Elevation (in metres) above sea level | ~2007 | Yamazaki D., D. Ikeshima, R. Tawatari, T. Yamaguchi, F. O'Loughlin, J.C. Neal, C.C. Sampson, S. Kanae & P.D. Bates. A high accuracy map of global terrain elevations. Geophysical Research Letters, vol.44, pp.5844-5853, 2017 doi: 10.1002/2017GL072874 |
| nighttime_lights | Night-time Lights | VIIRS night-time annual average radiance (in nW/cm2/sr), with Flares and Volcanoes filtered out. | 2015-2022 | This product was made utilizing Annual average-masked VNL 2.1/2.2 data produced by the Earth Observation Group, Payne Institute for Public Policy, Colorado School of Mines: Elvidge, C.D.; Zhizhin, M.; Ghosh, T.; Hsu, F.-C.; Taneja, J. Annual Time Series of Global VIIRS Nighttime Lights Derived from Monthly Averages: 2012 to 2019. Remote Sens. 2021, 13, 922. <https://doi.org/10.3390/rs13050922> |
| slope | Slope | Topographic slope (in degrees) | ~2007 | Yamazaki D., D. Ikeshima, R. Tawatari, T. Yamaguchi, F. O'Loughlin, J.C. Neal, C.C. Sampson, S. Kanae & P.D. Bates. A high accuracy map of global terrain elevations. Geophysical Research Letters, vol.44, pp.5844-5853, 2017 doi: 10.1002/2017GL072874 |
| travel_time_health | Travel Time to health Facilities | Motorised and walking time (minutes) to health facilities as provided by Malaria Atlas Project based on respective friction surfaces. | 2019 | Malaria Atlas Project; <https://malariaatlas.org/research-project/accessibility-to-healthcare/> |
| travel_time_urban | Travel Time to Urban Areas | Travel time (minutes) to edge of urban centres (SMOD class = 30) | 2020 | GHSL; <https://ghsl.jrc.ec.europa.eu/download.php?ds=smod> |

**SI.4 Geographical association between Temperature and Child Marriage**

**SI.4.1. Assessing the Influence of Poverty in the Spatial Analysis of Child Marriage and Temperature**

In GeoDa, the primary objective was to control for poverty when analyzing the spatial association between temperature and child marriage for both years. An Ordinary Least Squares (OLS) regression was conducted, with child marriage (CM_1 and CM_2) as the dependent variable and temperature (TM_1 and TM_2) and poverty (Poverty_rates) as independent variables, to assess the effect of poverty on child marriage and diagnose spatial dependence. An interaction term between poverty and temperature was tested to determine whether the relationship between temperature and child marriage varied at different poverty levels. However, the interaction term was not significant, and margins plots in STATA showed parallel trends across poverty quartiles, indicating no justification for including an interaction effect. Variance Inflation Factor (VIF) tests confirmed that multicollinearity was not a concern (VIF < 5).

Although poverty was a significant predictor of child marriage in the OLS model, spatial diagnostics indicated strong spatial dependence at both time points. Additionally, a comparison of log-likelihood (LL) values between OLS and the Spatial Error Model (SEM) showed that SEM had a higher LL, suggesting a better model fit. Given that Moran’s I and other spatial dependence tests were significant, a spatial model was required. To determine the most appropriate spatial model, Robust Lagrange Multiplier (LM) tests were used. Since the Robust LM (Error) test was consistently stronger than the Robust LM (Lag) test, the Spatial Error Model (SEM) was selected for both time points. Results from the SEM showed that poverty was no longer a significant predictor of child marriage, whereas temperature remained significant. This suggests that after accounting for spatial dependencies, temperature still has an effect on child marriage, while the influence of poverty diminishes.

**Table SI.4.1.1 Model Diagnostics: Evaluating the Fit and Assumptions of the SEM and OLS Models Testing the Effect of Temperature on Child Marriage, Controlling for Poverty, for round 1 (2014) and round 2 (2022) for 335 sub-counties in Kenya.**

| **OLS model** |  | **Round 1** | **Round 2** |
| --- | --- | --- | --- |
|  | R-squared | 0.353207 | 0.425684 |
|  | Log likelihood | 296.488 | 343.889 |
|  | DIAGNOSTICS FOR SPATIAL DEPENDENCE |  |  |
|  | Moran's I - Value (Prob) | 22.9386 (0.00000) | 21.5005 (0.00000) |
|  | Lagrange Multiplier (lag) - Value (Prob) | 491.35 (0.00000) | 443.7201 (0.00000) |
|  | Robust LM (lag) - Value (Prob) | 12.93 (0.00032) | 20.8735 (0.00000) |
|  | Lagrange Multiplier (error) - Value (Prob) | 501.65 (0.00000) | 439.9673 (0.00000) |
|  | Robust LM (error) - Value (Prob) | 23.24 (0.00000) | 17.1206 (0.00000) |
|  |  |  |  |
| **SEM model** |  | Round 1 | Round 2 |
|  | R-squared | 0.909253 | 0.892286 |
|  | Log likelihood | 571.485856 | 573.526793 |
|  | Lag coeff. (Lambda) - Coeff (Prob) | 0.955431 (0.00000) | 0.941591 (0.00000) |

**Table SI.4.1.2 Structural Equation Model (SEM) Output: Effect of Temperature on Child Marriage, Controlling for Poverty for round 1 (2014), at sub-county level in Kenya.**

| Variable | Coefficient | Std.Error | z-value | Probability |
| --- | --- | --- | --- | --- |
|  |  |  |  |  |
| CONSTANT | 0.120109 | 0.054499 | 2.20386 | 0.02753 |
| TM_R1 | 0.005184 | 0.001181 | 4.38997 | 0.00001 |
| Poverty_rates | -3.48E-05 | 0.000178 | -0.19582 | 0.84475 |
| LAMBDA | 0.955431 | 0.013689 | 69.7944 | 0 |

**Table SI.4.1.3 Structural Equation Model (SEM) Output: Effect of Temperature on Child Marriage, Controlling for Poverty for round 2 (2022), at sub-county level in Kenya.**

| Variable | Coefficient | Std.Error | z-value | Probability |
| --- | --- | --- | --- | --- |
|  |  |  |  |  |
| CONSTANT | 0.148043 | 0.046072 | 3.2133 | 0.00131 |
| TM_R2 | 0.003918 | 0.001213 | 3.23108 | 0.00123 |
| Poverty_rates | -2.66E-05 | 0.000179 | -0.14889 | 0.88164 |
| LAMBDA | 0.941591 | 0.01636 | 57.5536 | 0 |

**SI.4.2. Univariate and Bivariate Spatial Analyses**

**Figure SI.4.2.1: Moran’s I (Univariate Global MI’s).** Panel a) Child marriage Round 1 (CM_ 1); Panel b) Child Marriage Round 2 (CM_2); Panel c) Land Surface Temperature Round 1 (TM_1) and Panel d) Land Surface Temperature Round 2 (TM_2).

We first assessed the degree of global spatial [autocorrelation](https://www.sciencedirect.com/topics/earth-and-planetary-sciences/autocorrelation), or the degree to which one spatial unit shares similar or different characteristics with its neighbouring spatial unit, by using the Moran's *I* statistic (using n=999 permutations yielding a pseudo p value of 0·001). [CM= child marriage (below 18); TM= average temperature]

| CM_1 = 0.864  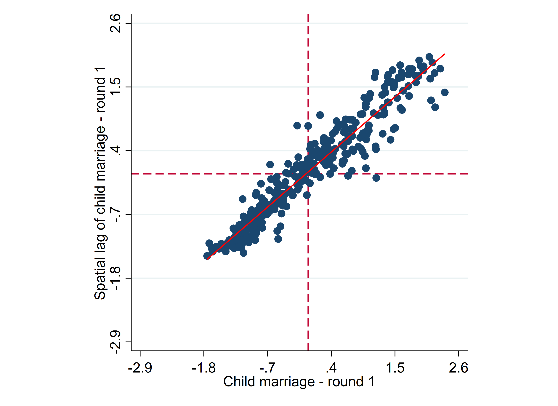  a) | CM_2 = 0.856  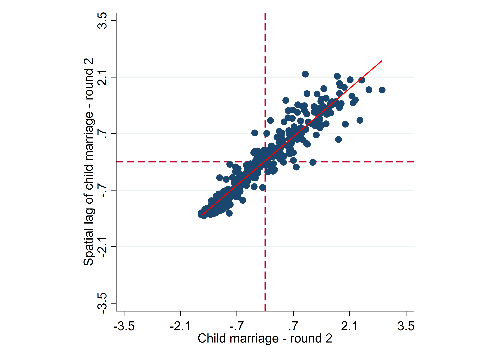  b) |
| --- | --- |
| TM_R1 = 0.842  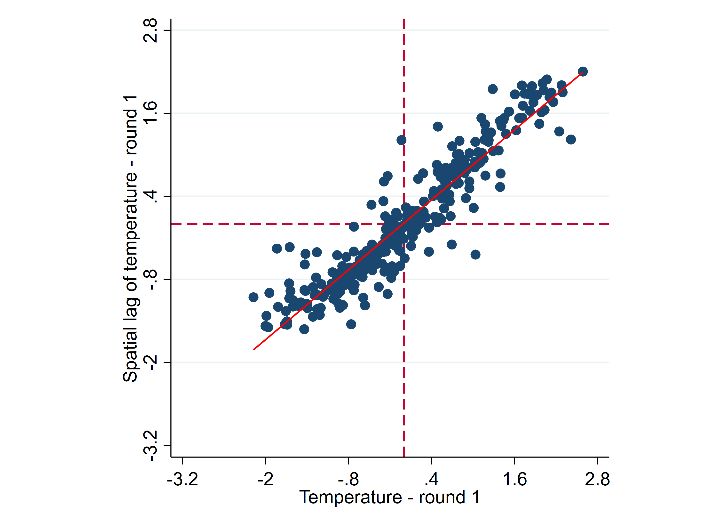  c) | TM_R2 = 0.862  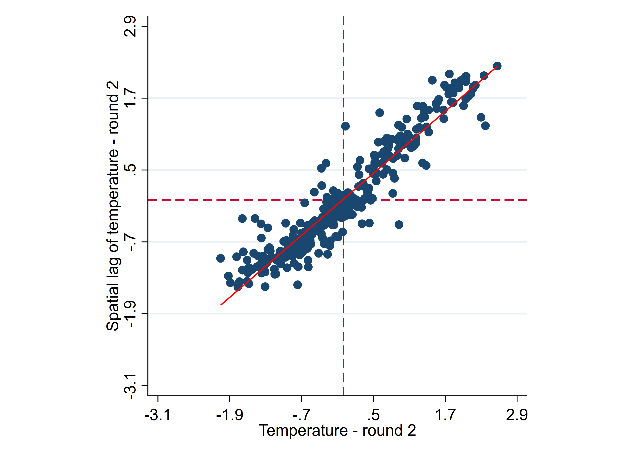  d) |

**SI.4.3: Spatial Analyses (LISA and BiLISA Cluster Maps) and Significance Maps**

**Figure SI.4.3.1 LISA Cluster maps for a) Child Marriage at Round 1 and b) Child Marriage at Round 2**

| 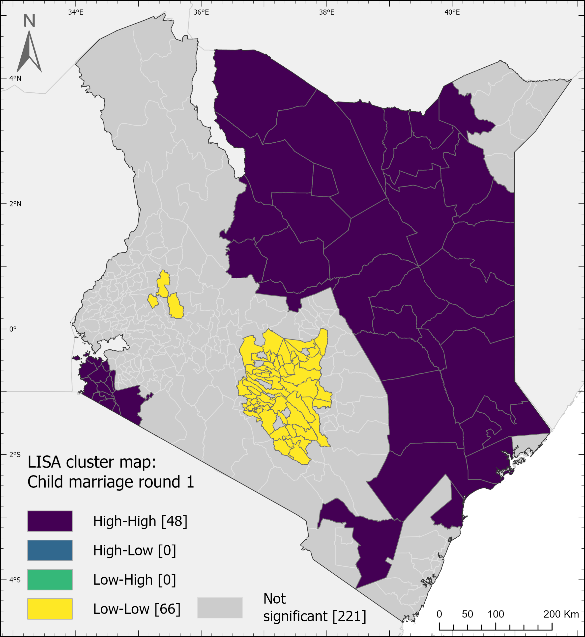  a) | 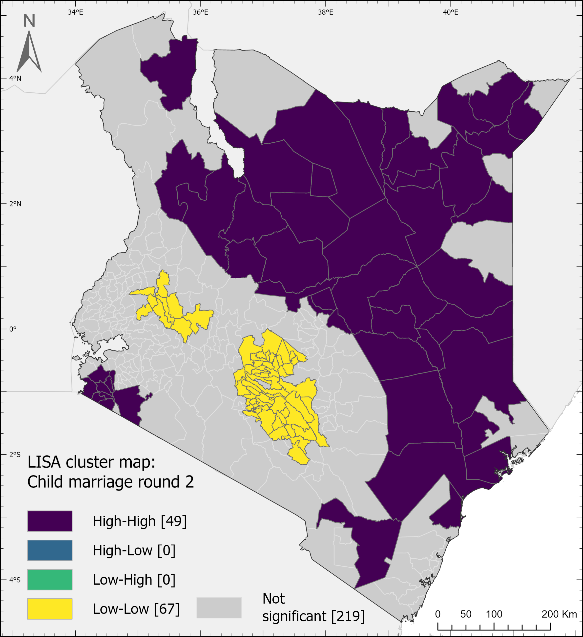  b) |
| --- | --- |

**Figure SI.4.3.2 Significance maps for Panel a) Child Marriage at Round 1; Panel b) Child Marriage at Round 2**

| 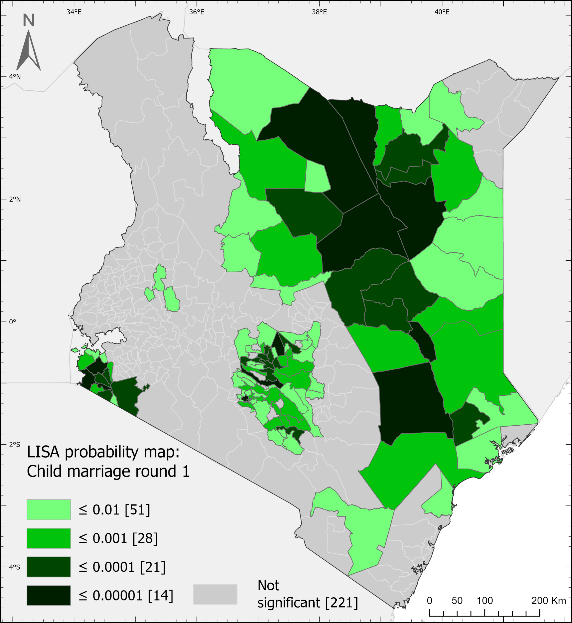  a) | 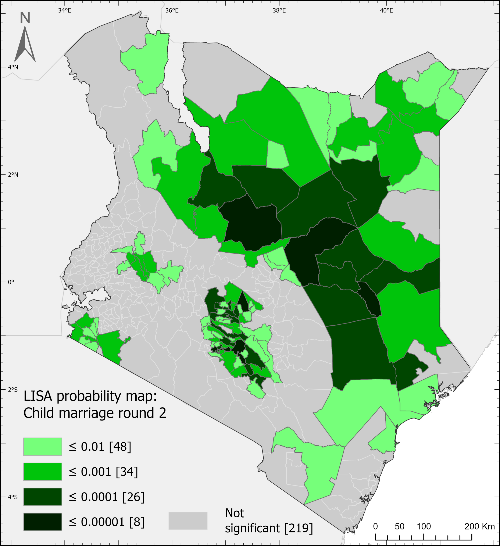  b) |
| --- | --- |

**Figure SI.4.3.3 LISA Cluster maps for a) Temperature at Round 1 and b) Temperature at Round 2**

| 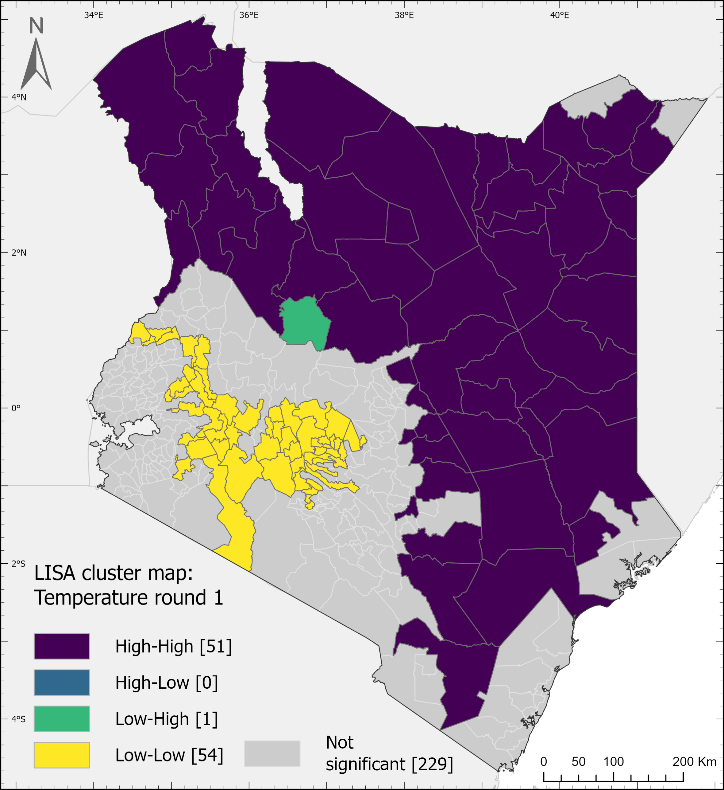  a) | 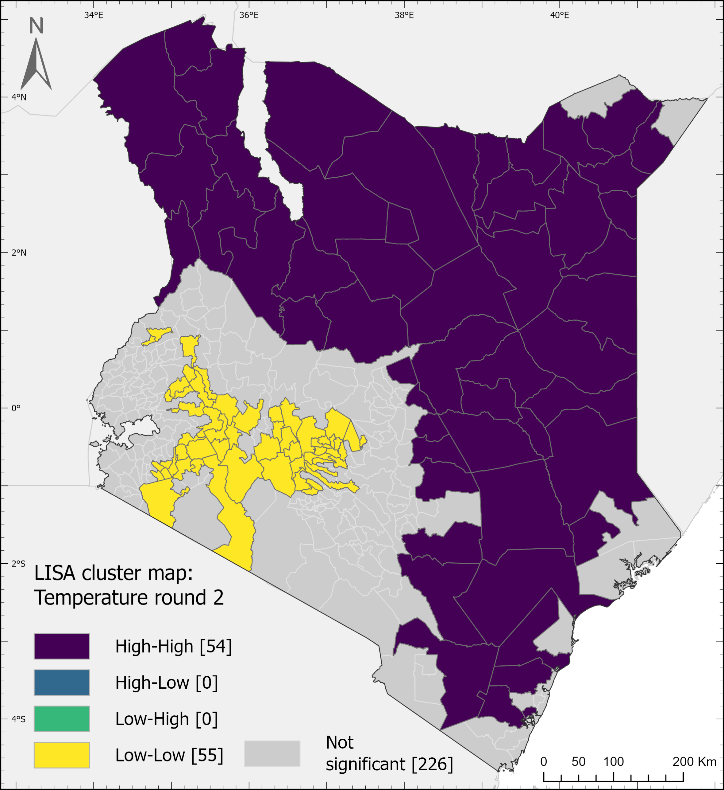  b) |
| --- | --- |

**Figure SI.4.3.4 Significance Maps for Panel a) Temperature Round 1 and Panel b) Temperature Round 2**

| 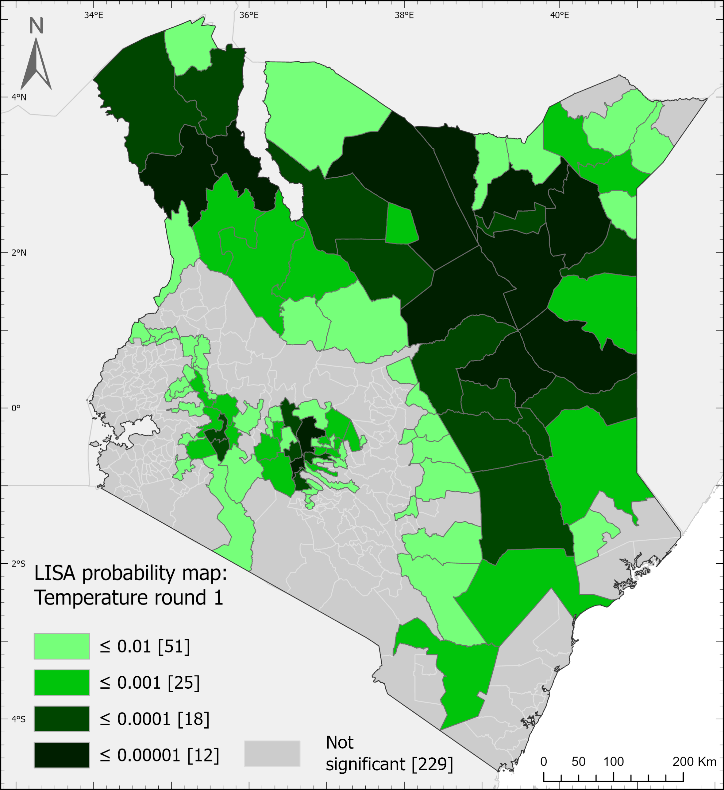  a) | 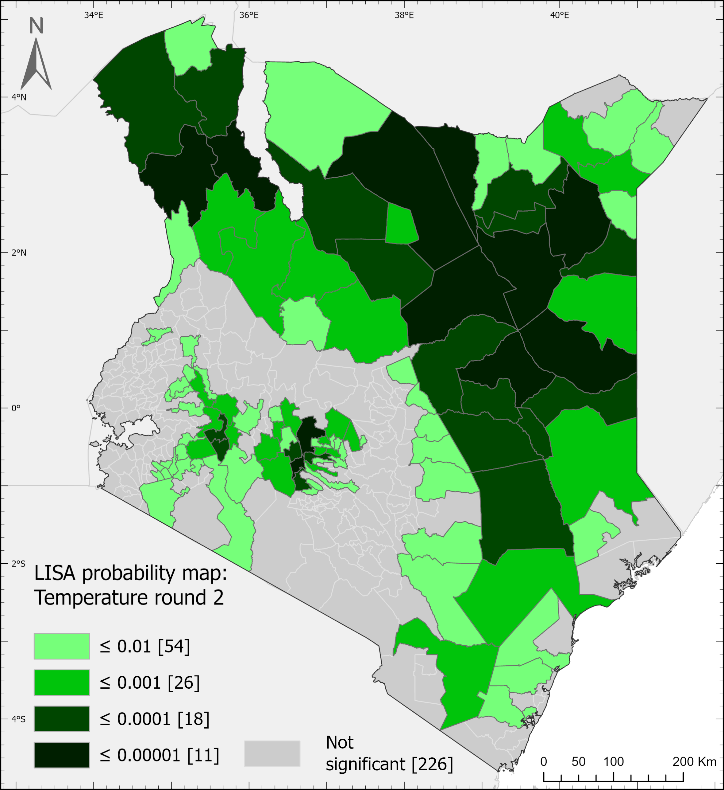  b) |
| --- | --- |

**Figure SI.4.3.5 BiLisa significance maps for Panel a) CM_R1/TM_R1 and Panel b) CM_R2/TM_R2**

| 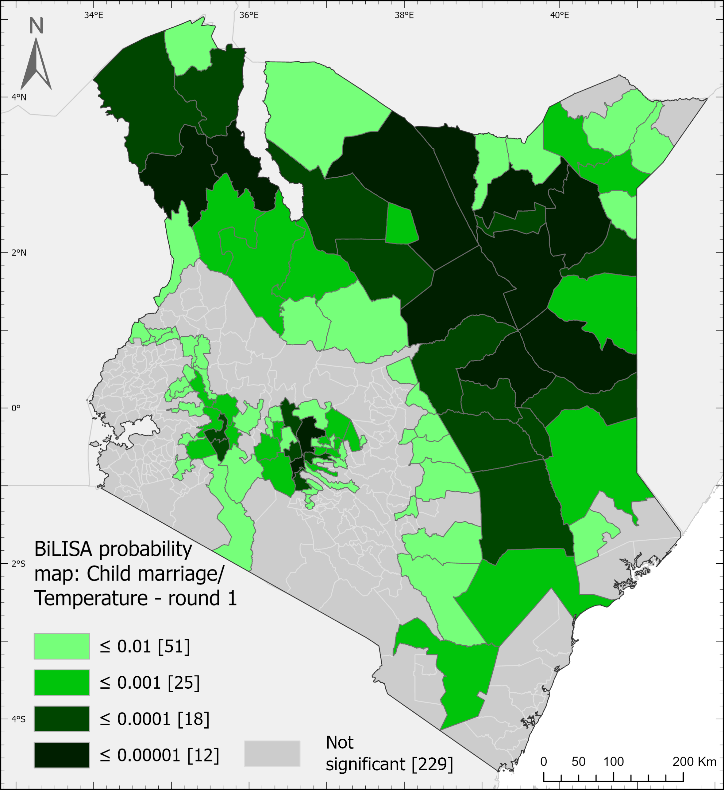  a) | 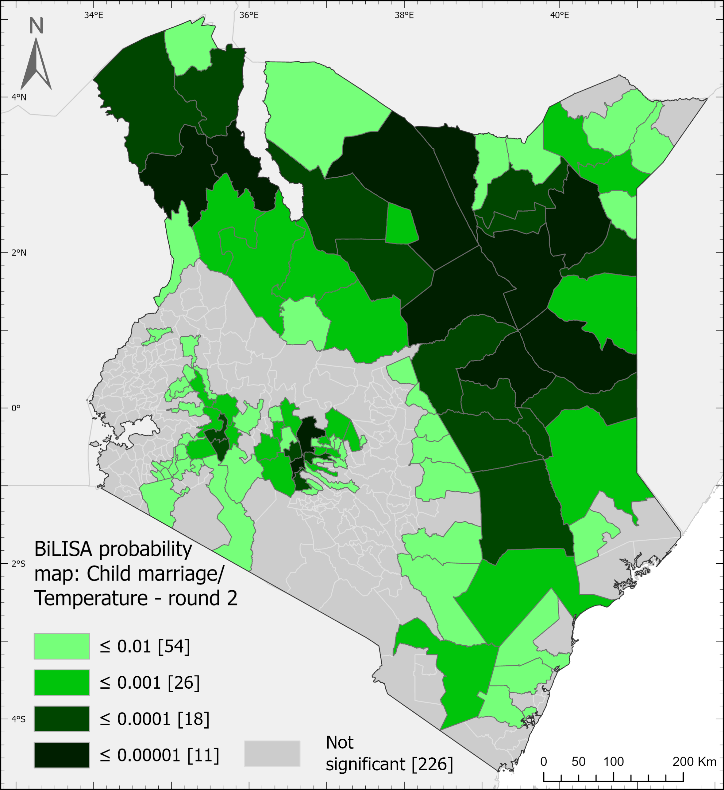  b) |
| --- | --- |
